# Supplementary material for: Effects of Moderate Alcohol Consumption in Non-Alcoholic Fatty Liver Disease
Source: MDPI journal article supplement (doi:10.3390/jcm11030890), 2022-02-08
Supplement: s1 [file s1]

**Supplementary material to the article**

**Effects of moderate alcohol consumption in non-alcoholic fatty liver disease**

Peter Lemmer<sup>1,2</sup>, Paul Manka<sup>1</sup>, Jan Best<sup>1</sup>, Alisan Kahraman<sup>3</sup>, Julia Kälsch<sup>3</sup>, Ramiro Vilchez-Vargas<sup>2</sup>, Alexander Link<sup>2</sup>, Hsin Chian<sup>3</sup>, Guido Gerken<sup>3</sup>, Ali Canbay<sup>1</sup>, Lars P. Bechmann<sup>1</sup> and Svenja Sydor<sup>1</sup>

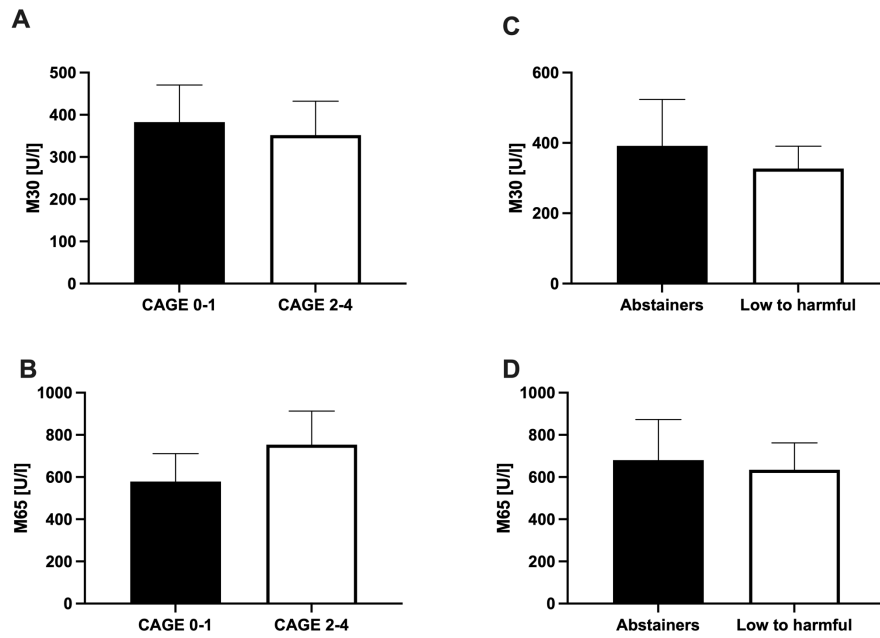

**Figure S1. Cell death parameters.** Comparison of hepatocellular apoptosis (M30; A/C) and total cell death (M65, B/D) in serum of NASH patients in CAGE 0-1 versus CAGE 2-4 (following CAGE questionnaire) and abstainers versus low to harmful consumers (following AUDIT questionnaire).

**Table S1.** Characteristics of the Quitters

|                  | <b>Sex</b> | <b>Age</b> | <b>BMI</b> | <b>Diabetes</b> | <b>Arterial<br/>hypertension</b> | <b>Dyslipidemia</b> |
|------------------|------------|------------|------------|-----------------|----------------------------------|---------------------|
| <b>Quitter 1</b> | male       | 50         | 29.4       | no              | yes                              | yes                 |
| <b>Quitter 2</b> | male       | 65         | 28.7       | yes             | yes                              | no                  |
| <b>Quitter 3</b> | male       | 55         | 30.4       | no              | yes                              | no                  |
